# Supplementary material for: “I Discovered I Love to Pray Alone Too”: Pluralist Muslim Women’s Approaches to Practicing Islam during and after Ramadan 2020
Source: MDPI journal article supplement (doi:10.3390/rel12090784), 2021-09-17
Supplement: s1 [file s1]

# Muslim women and the Ramadan during the coronavirus pandemic

Thank you for agreeing to take part in this anonymous survey and Ramadan Mubarak!

We are two scholars of gender and Islam. (Dr. Anna Piela: independent scholar, USA, Dr. Joanna Krotofil: <https://religioznawstwo.uj.edu.pl/web/instytut-religioznawstwa/dr-joanna-krotofil>, currently at the Jagiellonian University, Poland. )

We are hoping to find out how this year's Ramadan, celebrated under lockdown during the Coronavirus pandemic, is experienced by Muslim women living in the UK and the United States.

This year much has been written about the unusual circumstances under which the Jewish and Christian communities celebrated Passover and Easter.

As Ramadan has just started and the pandemic is continuing, we are hoping to find respondents (who self-define as Muslim and women) willing to anonymously answer some questions about their experience of this year's exceptional Ramadan under lockdown.

We are hoping to publish 1 academic and 1 non-academic, public-access article on this topic. Submission of entries means that you consent to use of anonymized quotes from your responses in academic and non-academic publications.

If you are answering the below questions please keep in mind that this is a qualitative study, so the longer and more reflexive answer, the more useful it is for analysis. If a question does not describe your experience, please enter "n/a."

How are you coping with the physical isolation from the community?

How may you be using the Internet to enhance your experience of Ramadan this year?

Are you focused more on any particular aspect of Ramadan (prayer, study, spending time with family)?

Are your family dynamics different?

What are the new aspects of your spirituality that you may be discovering?

Is your daily/nightly rhythm different to previous Ramadans?

Does the lockdown during Ramadan change the way you work? (in paid/unpaid contexts)

How is the lockdown affecting your self-care practices?

Thank you, JazakAllahKair, Shukran! Please email us at [anna.piela@northwestern.edu](mailto:anna.piela@northwestern.edu) or [joanna.krotofil@uj.edu.pl](mailto:joanna.krotofil@uj.edu.pl) if you have any questions.

How are you coping with the physical isolation from the Muslim community? Please describe your strategies. ★

Long-answer text

Are you using the Internet to enhance your experience of Ramadan this year? If yes, how? \*

Long-answer text

What are the new aspects of your spirituality that you may be discovering? \*

Long-answer text

Is your daily/nightly rhythm different to previous Ramadans? \*

Long-answer text

Are you focused more on any particular aspect of Ramadan (prayer, study, spending time with family)? ★

Long-answer text

Are your family dynamics different? If yes, how? \*

Long-answer text

Does the lockdown during Ramadan change the way you work? (in paid/unpaid contexts) If yes, <sup>\*</sup> how?

Long-answer text

How is the lockdown affecting your self-care practices? \*

Long-answer text

How old are you? \*

Short-answer text

What Islamic tradition/school/branch do you represent, if applicable? \*

Short-answer text

Can you say something about where you're from (region, country, whether you live in a small/medium/large sized locality)

Short-answer text

Are you a revert or born Muslim?

1. Born Muslim
2. Revert
3. Other
